# Supplementary material for: House of the Vetii at Pompeii
Source: Royal Society of Chemistry journal article supplement (doi:10.1039/d2cs00123c), 1999-01-01
Supplement: d2cs00123c1.pdf [file d2cs00123c1.pdf]

## Electronic supplementary information for **Porous Organic Polymers in Solar Cells**

Tianyi Zhang,<sup>1</sup> Vasilis G. Gregoriou,<sup>2,3</sup> Nicola Gasparini,<sup>1</sup> Christos L. Chochos\*<sup>2,4</sup>

<sup>1</sup> *Department of Chemistry and Centre for Processable Electronics, Imperial College London, W12 0BZ, UK.*

<sup>2</sup> *Advent Technologies SA, Stadiou Street, Platani, Rio, Patras 26504, Greece.*

<sup>3</sup> *National Hellenic Research Foundation, 48 Vassileos Constantinou Avenue, Athens, 11635, Greece.*

<sup>4</sup> *Institute of Chemical Biology, National Hellenic Research Foundation, 48 Vassileos Constantinou Avenue, Athens 11635, Greece*

*Corresponding author email addresses: [cchochos@advent.energy](mailto:cchochos@advent.energy), [chochos@eie.gr](mailto:chochos@eie.gr)*

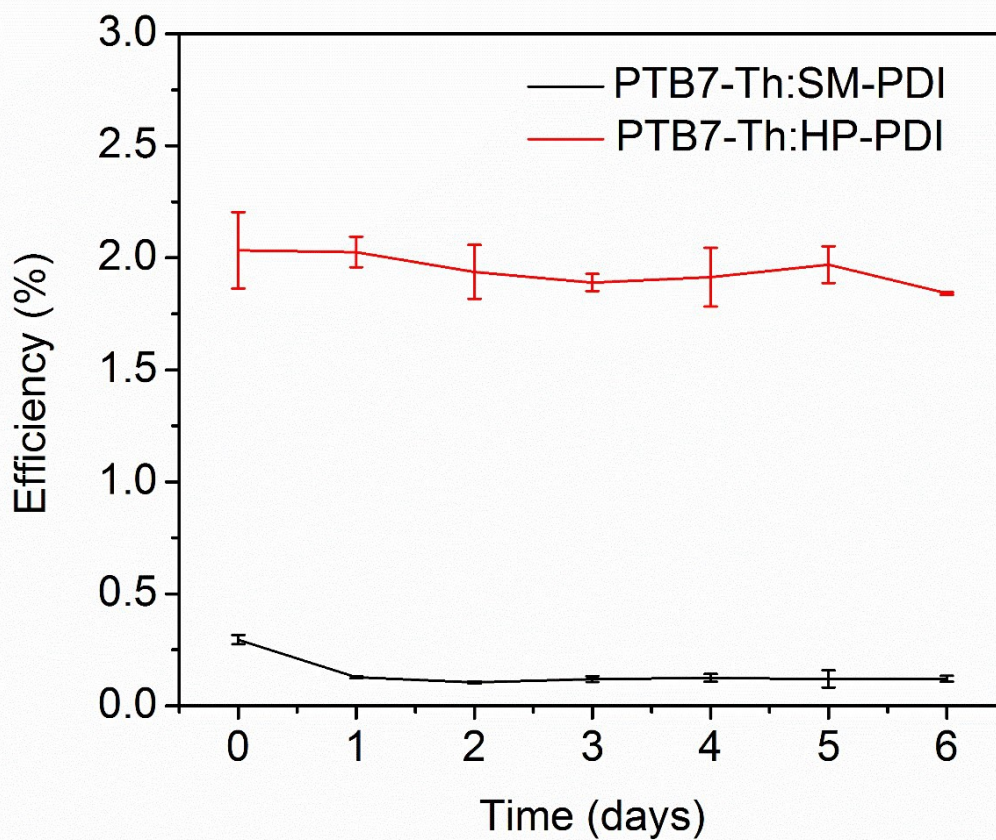

Figure S1 The stability data of OSC with PTB7-Th:SM-PDI (black) and PTB7-Th:HP-PDI (red) up to six days. Reproduced with permission from ref<sup>1</sup>. Copyright 2017, Royal Society of Chemistry.

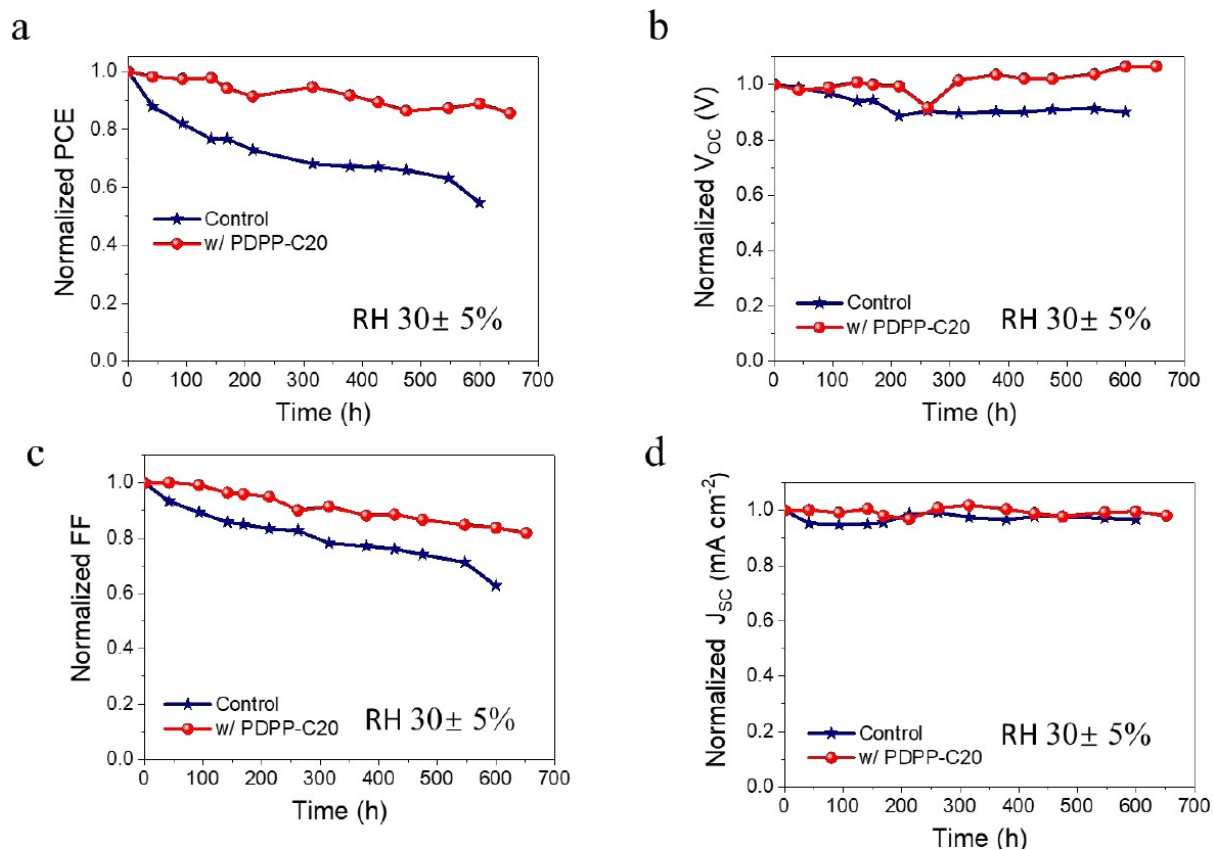

Figure S2 Normalized Stability data regarding solar cells with (red dots and line) or without (dark blue dots and line) PDPP-C20 in terms of (a) PCE; (b)  $V_{oc}$ ; (c) FF; (d)  $J_{sc}$ . The devices are stored under room temperature and non-encapsulated environment with a relative humidity of  $30 \pm 5\%$ . Reproduced with permission from ref<sup>2</sup>. Copyright 2021, Springer Nature.

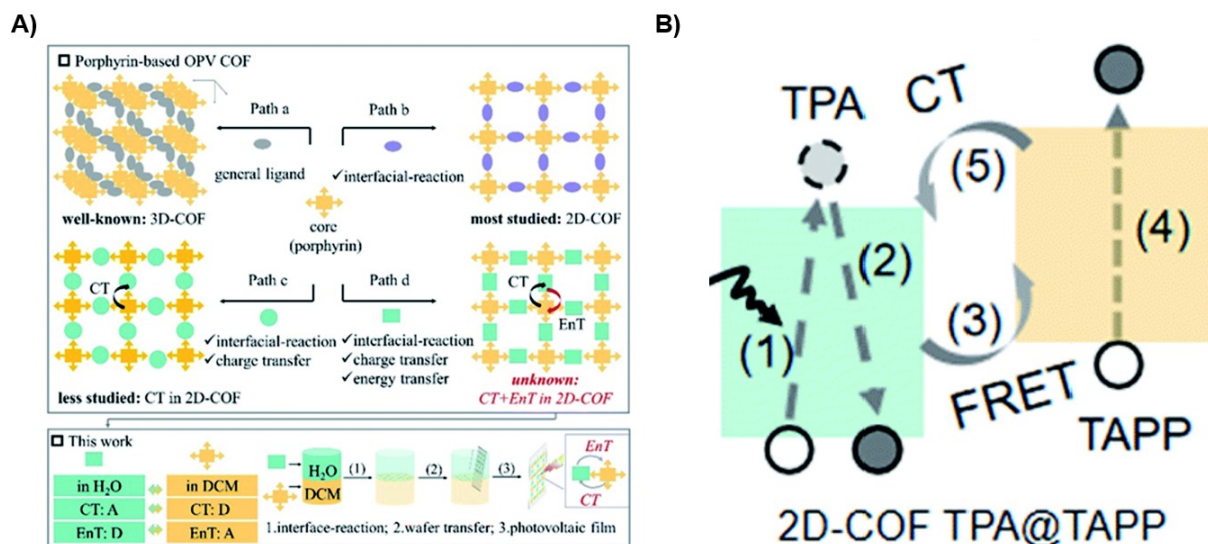

Figure S3 A) schematics of the common object-oriented path for porphyrin-based OPV COF synthesis, the lower diagram depicts the synthetic flow of incorporating TAPP and TPA as building blocks. B) Photophysical process of D-A heterojunction COF. (1) Photons excitation in TPA; (2) relaxation and emission; (3) ultrafast energy transfer from TPA domain to TAPP domain; (4) excitation of TAPP; (5) charge transfer from TAPP to TPA. Reproduced with permission from ref<sup>3</sup>. Copyright 2020, Royal Society of Chemistry.

## References

- 1 J. Zhang, S. Xie, X. Zhang, Z. Lu, H. Xiao, C. Li, G. Li, X. Xu, X. Chen and Z. Bo, *Chemical Communications*, 2017, **53**, 537–540.
- 2 Q. Fu, T. Wang, Y. Sun, N. Zheng, Z. Xie, D. Lu, Z. Xu, X. Wan, Y. Zhang and Y. Liu, *Science China Chemistry*, , DOI:10.1007/s11426-020-9865-3.
- 3 L. Yao, Y. Zhang, H. X. Wang, Y. Guo, Z. M. Zhuang, W. Wen, X. Zhang and S. Wang, *Journal of Materials Chemistry A*, 2020, **8**, 8518–8526.
